# Supplementary material for: A porphyrin/β-cyclodextrin conjugated nano-system having a pan–lid molecular structure for smart drug carrier applications
Source: Royal Society of Chemistry journal article supplement (doi:10.1039/c4ob00393d), 2014-01-01
Supplement: c4ob00393d1.pdf [file c4ob00393d1.pdf]

Supporting Information

**A porphyrin/ $\beta$ -cyclodextrin conjugated nanostructure having a Pan-Lid  
molecular structure for smart drug carrier applications**

Placido Mineo<sup>\*a,b</sup>

[a] Dipartimento di Scienze Chimiche and I.N.S.T.M. UdR of Catania, Università di Catania; Viale A. Doria, 6; 95125 Catania, Italy.

[b] CNR-IPCF Istituto per i Processi Chimico Fisici, Viale Ferdinando Stagno D'Alcontres, 37; 98158 - Messina, Italy.  
E-mail: gmineo@unict.it

Table of Contents

Figure S1: COSY correlation spectrum of H<sub>2</sub>PTEG<sub>3</sub>OH

Figure S2: t-ROESY correlation spectrum of H<sub>2</sub>PTEG<sub>3</sub>OH

Figure S3: COSY correlation spectrum of H<sub>2</sub>PTEG<sub>3</sub>-iPHTCl

Figure S4: t-ROESY correlation spectrum of H<sub>2</sub>PTEG<sub>3</sub>-iPHTCl

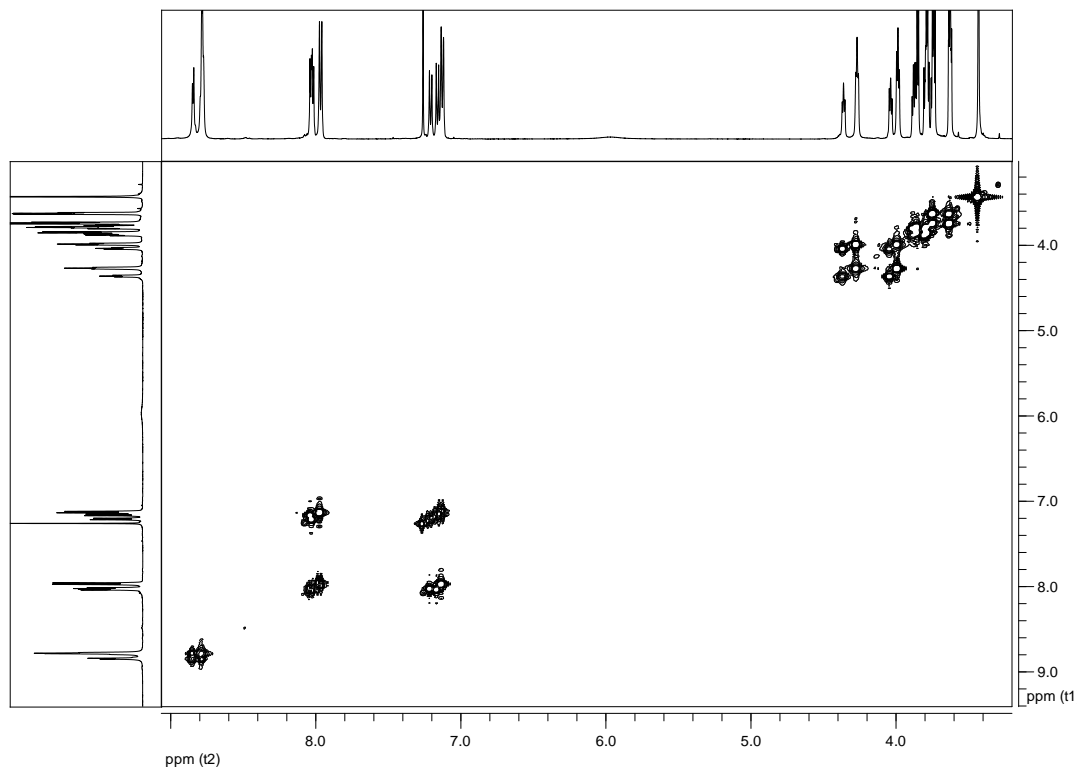

Figure S1: COSY correlation spectrum of H<sub>2</sub>PTEG<sub>3</sub>OH

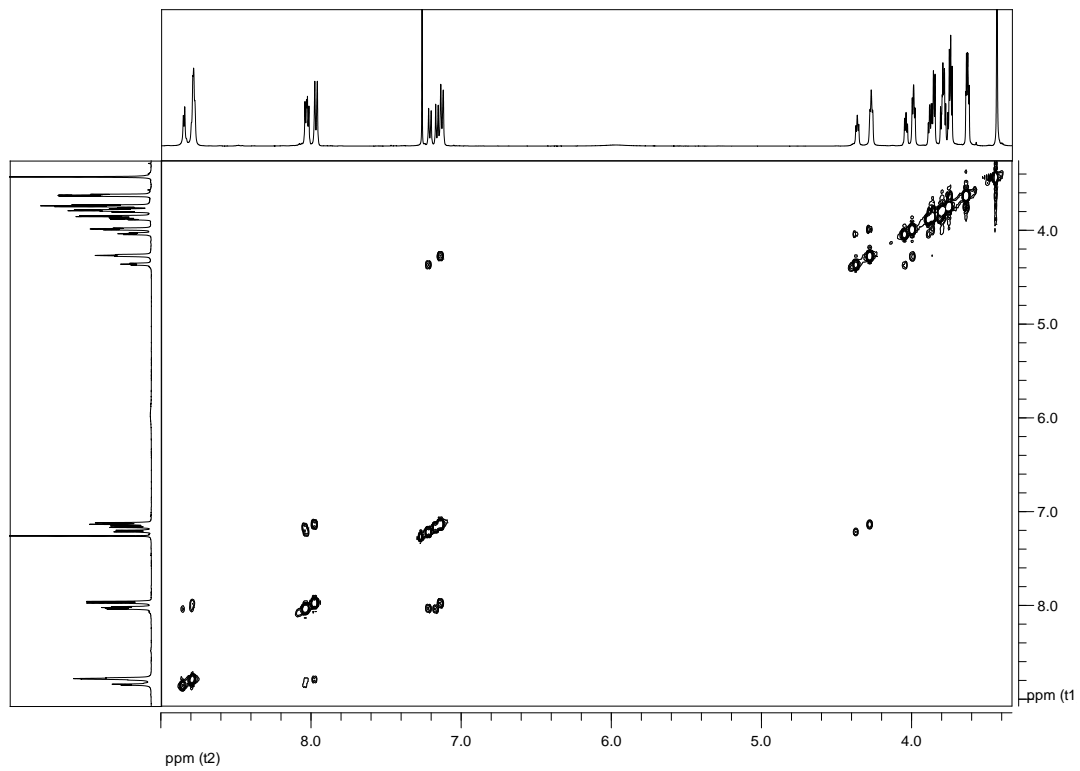

Figure S2: t-ROESY correlation spectrum of H<sub>2</sub>PTEG<sub>3</sub>OH

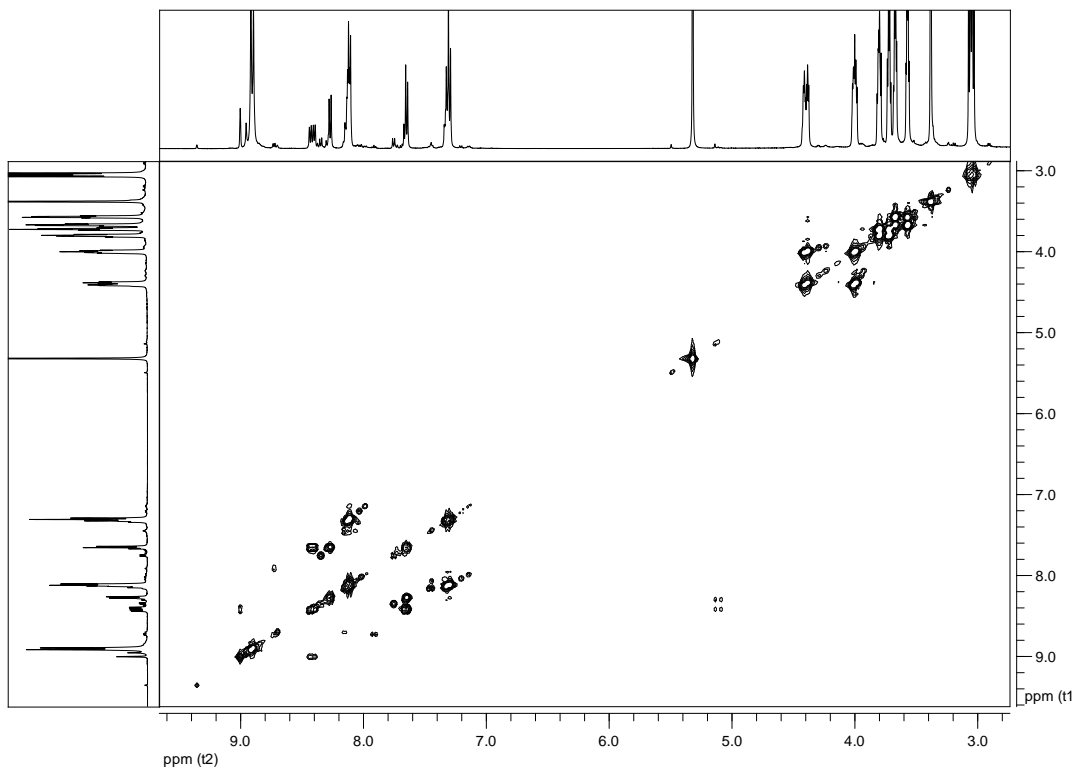

Figure S3: COSY correlation spectrum of H<sub>2</sub>PTEG<sub>3</sub>-iPHTCl

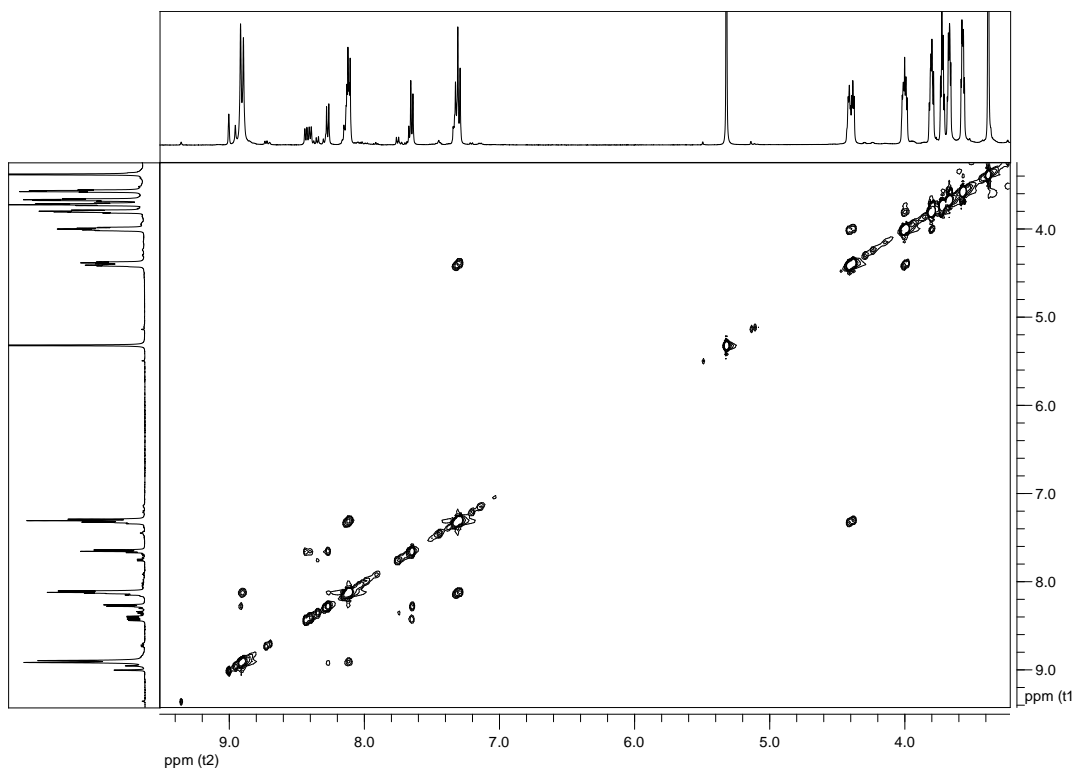

Figure S4: t-ROESY correlation spectrum of H<sub>2</sub>PTEG<sub>3</sub>-iPHTCl
